# Supplementary material for: PRMT5 is an actionable therapeutic target in CDK4/6 inhibitor-resistant ER+/RB-deficient breast cancer
Source: Springer Nature journal article supplement (doi:10.1038/s41467-024-46495-2), 2024-03-13
Supplement: MOESM1 [file 41467_2024_46495_MOESM1_ESM.pdf]

Supplementary Table. 1 List of primers

| Primers for cloning | Sequence                                                                       |                                 |
|---------------------|--------------------------------------------------------------------------------|---------------------------------|
| sgRB1_F1            | CACCGCTGAGCGCCGCGTCCAACCG                                                      |                                 |
| sgRB1_R1            | AAACCGGTTGGACGCGGCGCTCAGC                                                      |                                 |
| sgRB1_F2            | CACCGCTTCCCGCGTGAGGCGACGG                                                      |                                 |
| sgRB1_R2            | AAACCCGTCGCCTCACGCGGGAAGC                                                      |                                 |
| sgPRMT5_1           | tatatatctgtggaaaggacgaaaCACCGGATGGAAGACAGGCATGCAGGTTTtagagctagaaatagcaagttaaaa |                                 |
| sgPRMT5_2           | tatatatctgtggaaaggacgaaaCACCGACTCCCTCTTGAAACGCGGAGTTTtagagctagaaatagcaagttaaaa |                                 |
| sgPRMT5_3           | tatatatctgtggaaaggacgaaaCACCGATGAACTCCCTCTTGAAACGGTTTtagagctagaaatagcaagttaaaa |                                 |
| shPRMT5_3'UTR_F     | CCGGGGCTCAAGCCACCAATCTATGCTCGAGCATAGATTGGTGGCTTGAGCCTTTTT                      |                                 |
| shPRMT5_3'UTR_R     | AATTAAAAAGGCTCAAGCCACCAATCTATGCTCGAGCATAGATTGGTGGCTTGAGCC                      |                                 |
| PRMT5_E444Q_F       | TGCTGACAATcAATTGTCGCC                                                          |                                 |
| PRMT5_E444Q_R       | AATGAGCCCAGAAGCTCA                                                             |                                 |
| Primers for qPCR    | Fwd 5'-3'                                                                      | Rev 5'-3'                       |
| ASF1B               | CAT GGT AGG TGC AGG TGA TG                                                     | AGC AGG GAG ACA CAT GTT TG      |
| CDC25B              | CAG AGA CCT GCA TCA GAA GA                                                     | ACC CTC ACC CAG ACC AT          |
| CTPS1               | GCA CCT GCA TAC AAC CAG AT                                                     | CAT CCA CGT CAG TCT AGT TCC     |
| KIF2C               | TGA ATC AAC TGC TCT CCA CTG                                                    | TCT AGG ACT TGC ATG ATT GCC     |
| KPNA2               | ATC AAC AGA CCA ATT TAC AGT GC                                                 | AAG GAT GAC CAG ATG CTG AAG     |
| MCM7                | CCT TTG ACA TCT CCA TTA GCC T                                                  | GGA TGC CAC CTA TAC TTC TGC     |
| MKI67               | GAA GCT GGA TAC GGA TGT CA                                                     | CGC CTG GTT ACT ATC AAA AGG A   |
| MXD3                | GCT TCT CCA GTT CAT TGT GC                                                     | ATG GTT ATG CGT CCC TGT G       |
| MYBL2               | CTC TCC AGC TCC AAT GTG TC                                                     | GAT TCC TGT AAC AGC CTC ACG     |
| TK1                 | CGT CTC ATC AAC TCT GTG CTT T                                                  | GCA TTA ACC TGC CCA CTG T       |
| TOP2A               | TGT ACC ATT CAG GCT CAA CAC                                                    | GAT TCT GCT AGT CCA CGA TAC ATC |
| YWHAZ               | ACTTTTGGTACATTGTGGCTTCAA                                                       | CCGCCAGGACAAAACAGTAT            |

Supplementary Figure 1.

A

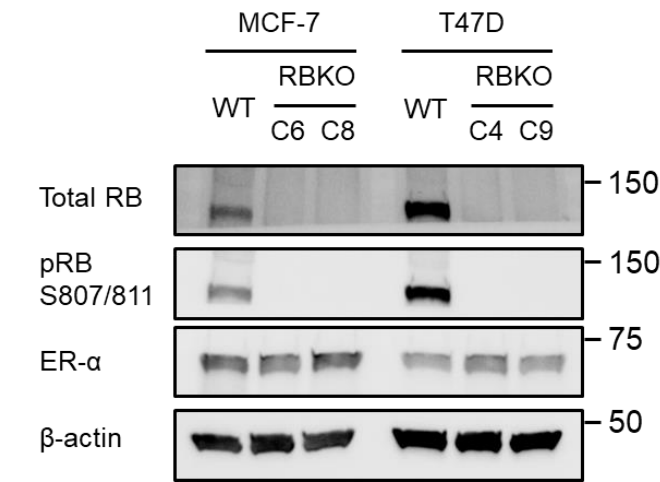

B

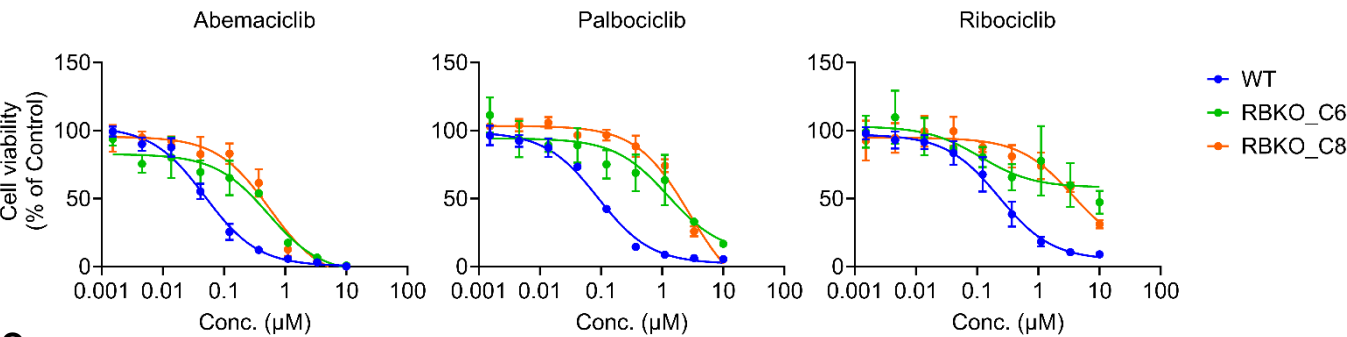

C

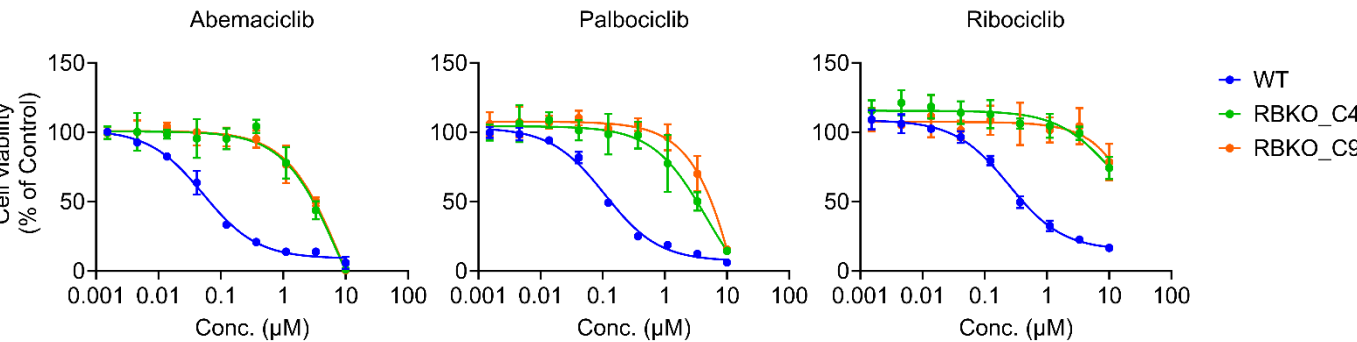

D

| IC50<br>μM (fold change) | Abemaciclib | Palbociclib | Ribociclib  |
|--------------------------|-------------|-------------|-------------|
| WT                       | 0.05 (1)    | 0.09 (1)    | 0.24 (1)    |
| RBKO_C6                  | 0.53 (10.6) | 1.26 (14.0) | ND          |
| RBKO_C8                  | 0.56 (11.2) | 2.80 (31.1) | 3.64 (15.8) |

E

| IC50<br>μM (fold change) | Abemaciclib  | Palbociclib   | Ribociclib |
|--------------------------|--------------|---------------|------------|
| WT                       | 0.05 (1)     | 0.11 (1)      | 0.24 (1)   |
| RBKO_C4                  | 7.59 (151.8) | 4.71 (42.8)   | ND         |
| RBKO_C9                  | 8.44 (168.8) | 32.54 (295.8) | ND         |

**Supplementary Figure 1. *RB1* knockout in ER+ breast cancer cells confers resistance to CDK4/6 inhibitors.**

**A)** Immunoblot analysis of MCF-7 and T47D *RB1* wild-type (WT) and *RB1* knockout (RBKO) cell lysates. The lysates were probed with the indicated antibodies (n = 2 biological replicates). **B-C)** Dose response curves of CDK4/6i. WT (blue) and RBKO (green and orange) cells of MCF-7 (**B**) and T47D (**C**) were treated with a dose range of abemaciclib, palbociclib, or ribociclib for 6 days. Cell viability was measured by the CyQuant assay (mean  $\pm$  SD, n = 3 biological replicates). **D-E)** IC<sub>50</sub> of abemaciclib, palbociclib, and ribociclib in WT and RBKO cells of MCF-7 (**D**) and T47D (**E**). Data represent IC<sub>50</sub> in  $\mu$ M and fold change in the parenthesis. ND: not determined. Source data are provided as a Source Data file.

Supplementary Figure 2.

A

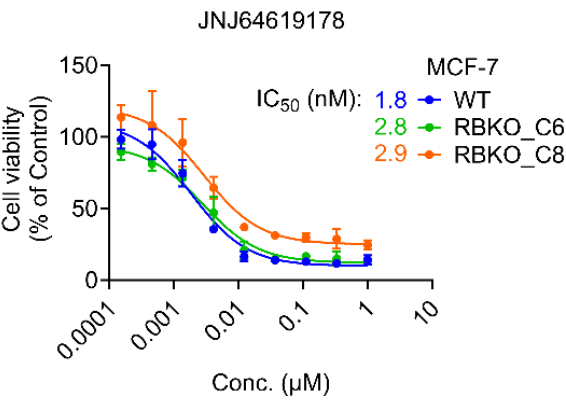

B

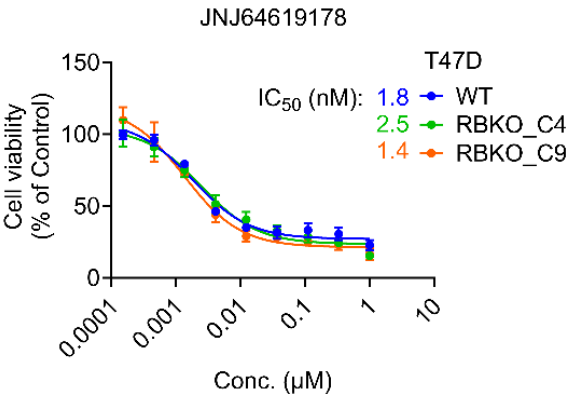

C

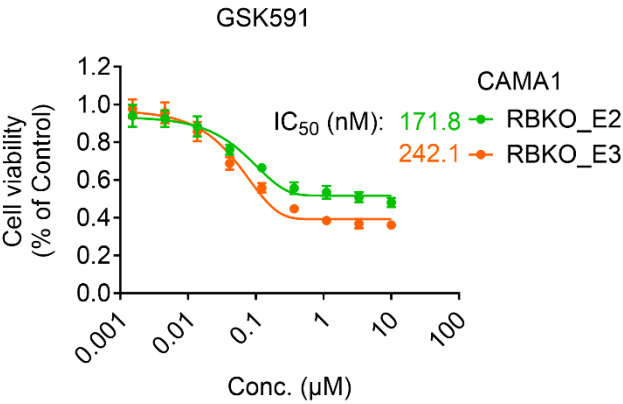

D

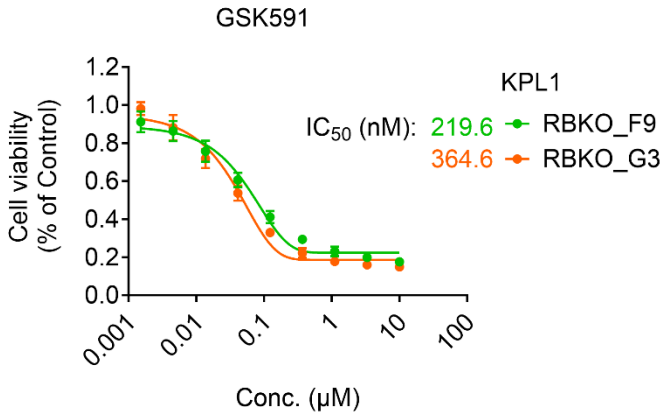

**Supplementary Figure 2. Sensitivity of ER+/*RB1* knockout (RBKO) breast cancer cells to PRMT5 inhibitor.**

**A-B)** Dose response curves of JNJ64619178 and **C-D)** GSK591. MCF-7 (**A**) and T47D (**B**) RBKO cells were treated with a concentration range of JNJ64619178 for 6 days. CAMA1 (**C**) and KPL1 (**D**) RBKO cells were treated with a concentration range of GSK591 for 6 days. Cell viability was measured by the CyQuant assay. Data represent mean  $\pm$  SD (n = 3 biological replicates). Source data are provided as a Source Data file.

Supplementary Figure 3.

A

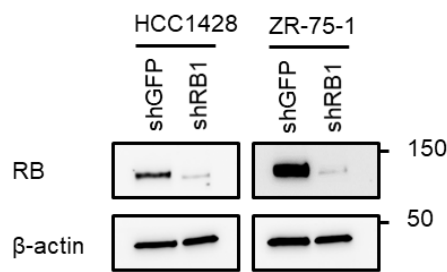

B

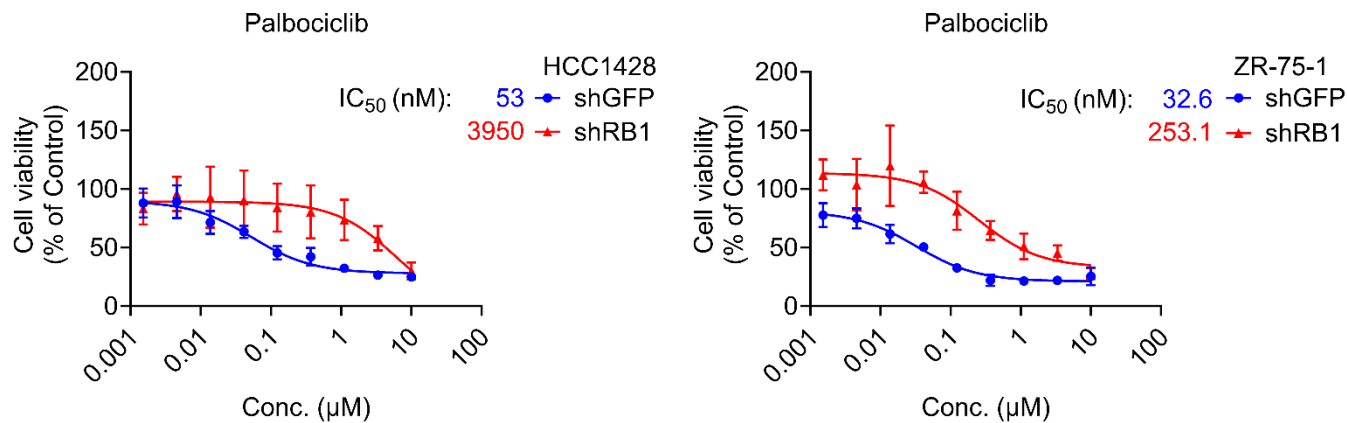

C

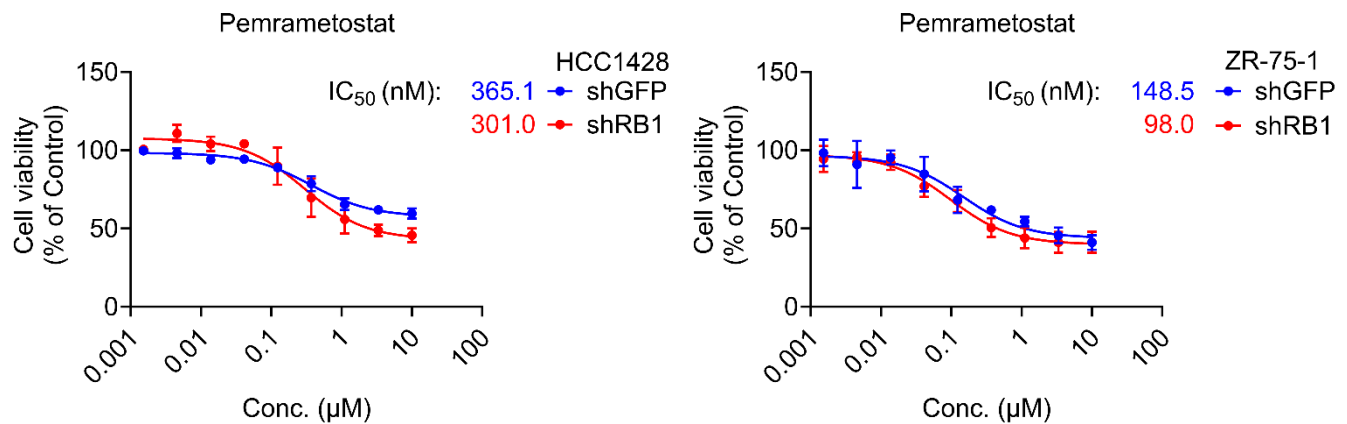

**Supplementary Figure 3. Pemrametostat inhibits growth of ER+/RB1 knockdown breast cancer cells.**

**A)** Immunoblot analysis. HCC1428 and ZR-75-1 cells were transduced with shGFP or shRB1. The lysates were probed with the indicated antibodies (n =2 biological replicates). **B-C)** Dose response curves. Cells were treated with a dose range of palbociclib (**B**) or pemrametostat (**C**) for 6 days. Cell viability was measured by the CyQuant assay (mean  $\pm$  SD, n = 3 biological replicates). Source data are provided as a Source Data file.

Supplementary Figure 4.

A

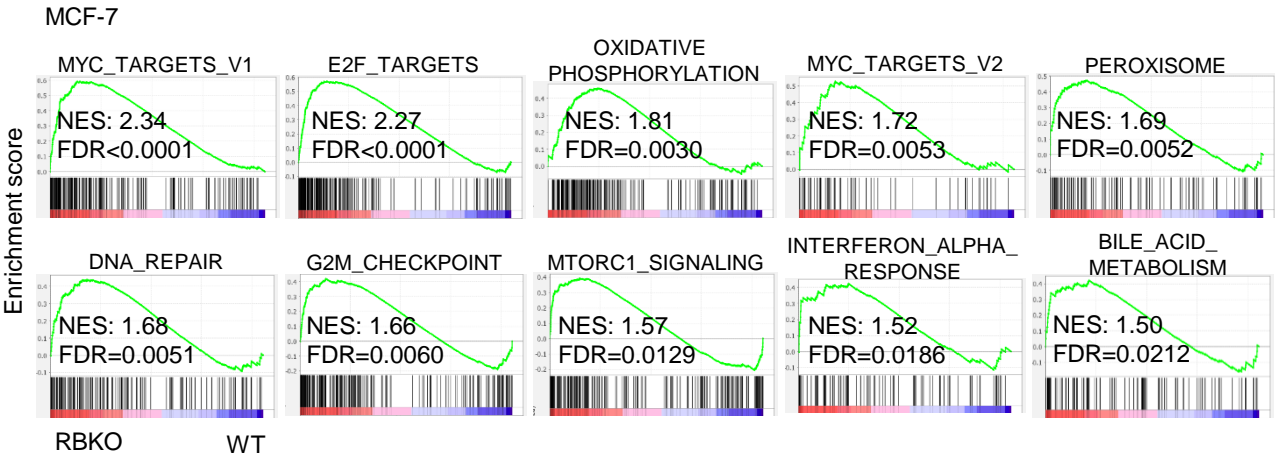

B

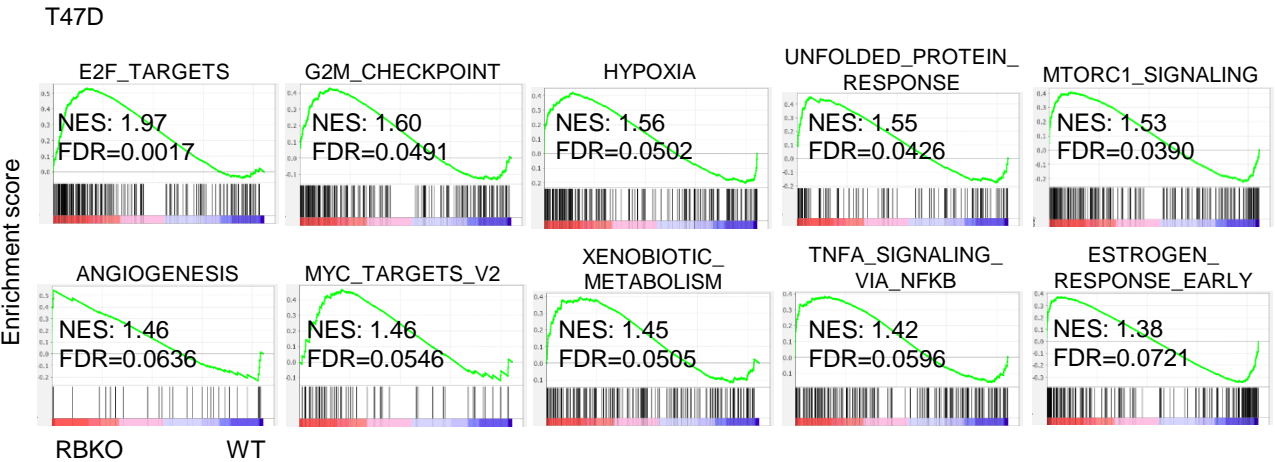

**Supplementary Figure 4. Top 10 of upregulated Hallmark gene signatures upon *RB1* knockout.**

**A-B)** Gene set enrichment analysis (GSEA) using RBKO vs WT RNA-seq data from MCF-7 (**A**) and T47D (**B**) cells. NES: normalized enrichment score; FDR: false discovery rate.

Supplementary Figure 5.

A

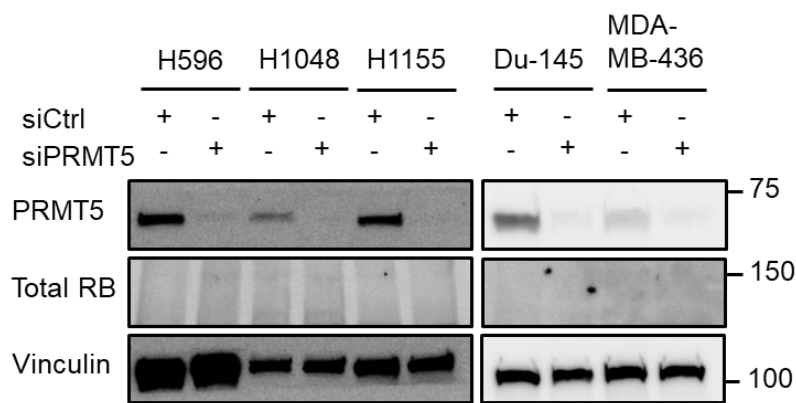

B

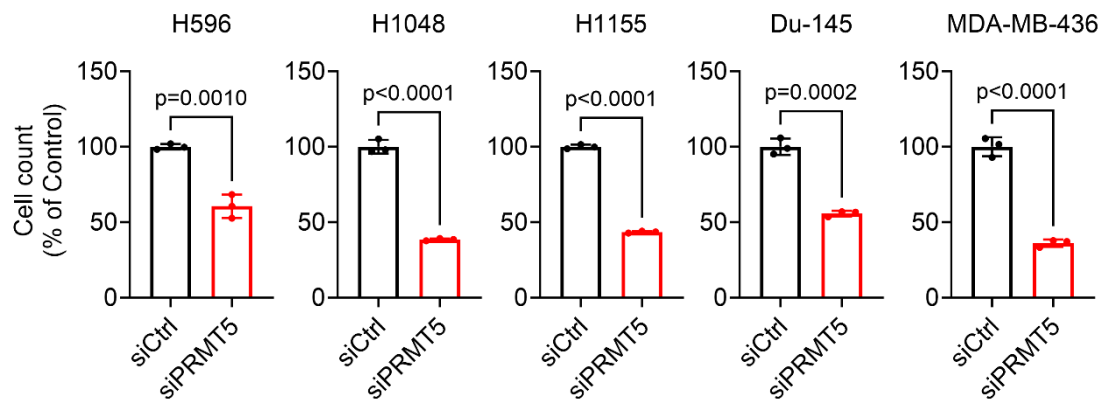

C

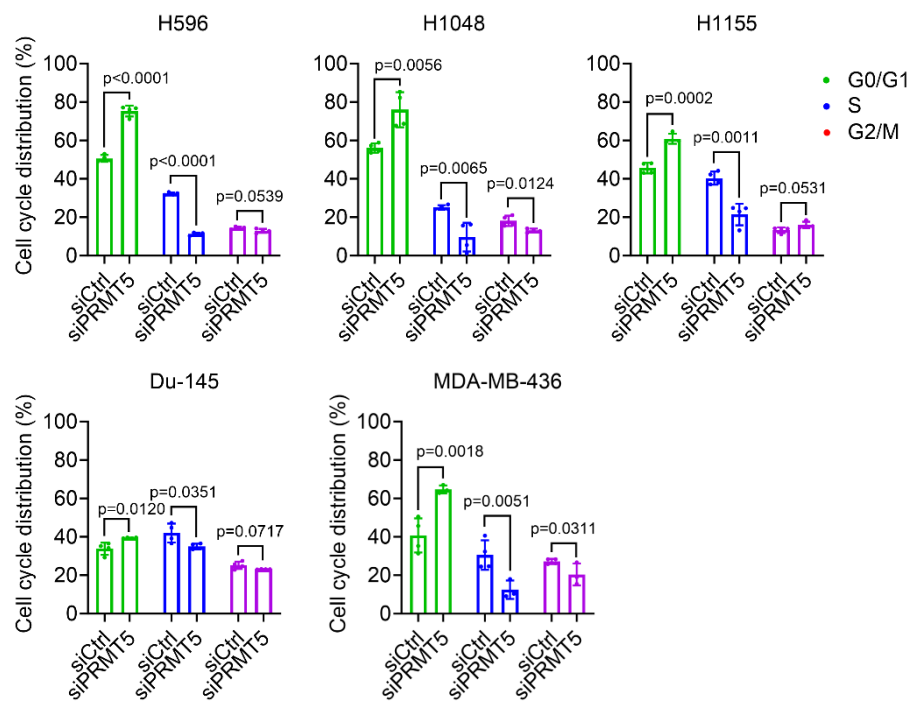

**Supplementary Figure 5. *PRMT5* knockdown in *RB1*-deficient cancer cells results in growth inhibition and blocks G1- to S-phase cell cycle progression.**

**A)** Immunoblot analysis of *RB1*-mutant lung cancer (H596, H1048 and H1155), prostate cancer (Du-145) and triple-negative breast cancer (MDA-MB-436) cells. Lysates were collected 3 days after transfection of control siRNA (siCtrl) or a siRNA targeting *PRMT5* (siPRMT5) and then probed with antibodies as indicated (n = 2 biological replicates). **B)** Growth of siCtrl- or siPRMT5-transfected *RB1*-mutant cancer cells. Cell number was counted using a Coulter counter after 4-6 days after siRNA transfection. Data represent mean  $\pm$  SD (n = 3 biological replicates), two-sided Student's t test. **C)** Cell cycle analysis. Cells were fixed 3-4 days after transfection of siCtrl or siPRMT5. Cells were stained with propidium iodide (PI) and then analyzed by flow cytometry. Data represent mean  $\pm$  SD (n = 4 biological replicates, MDA-MB-436 siPRMT5 n = 3 biological replicates), two-sided Student's t test. Source data are provided as a Source Data file.

Supplementary Figure 6.

A

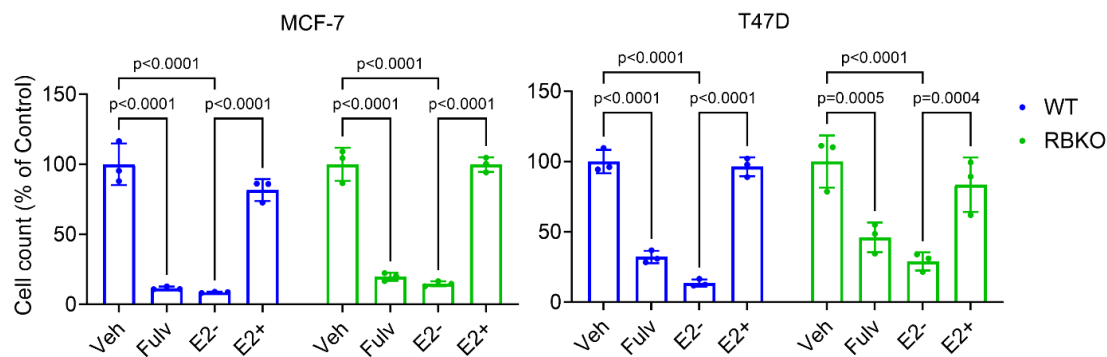

B

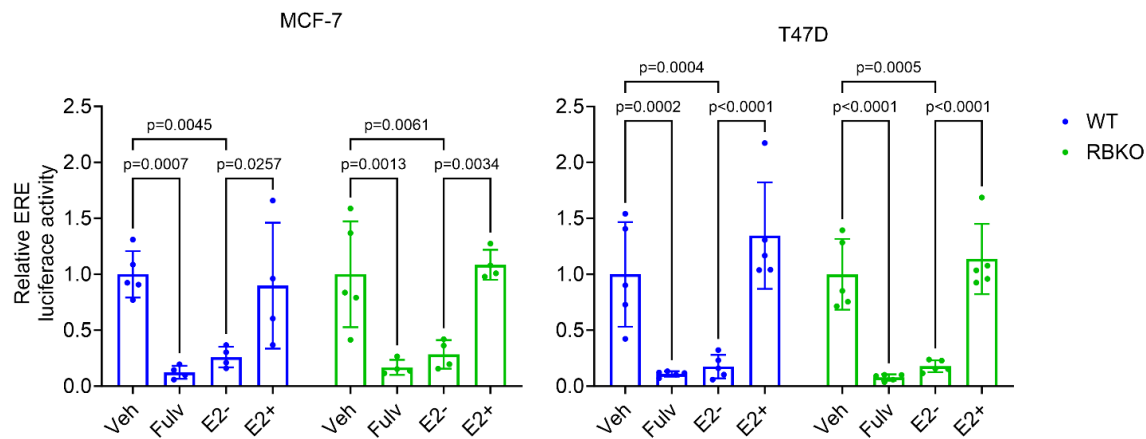

C

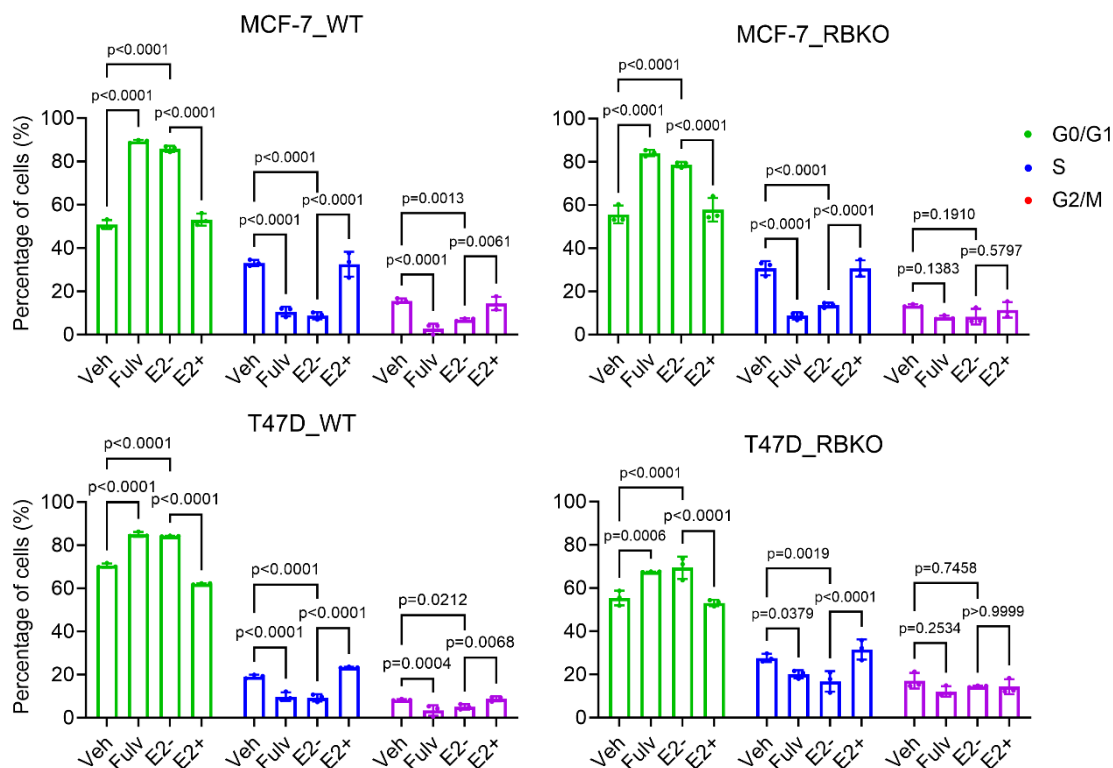

**Supplementary Figure 6. ER+ breast cancer cells are sensitive to anti-estrogens irrespective of *RB1* status.**

**A)** Monolayer growth of MCF-7 and T47D WT and RBKO cells treated with vehicle control (Veh), 10 nM fulvestrant (Fulv), E2-deprived IMEM (E2-) and 1 nM 17 $\beta$ -estradiol in E2-deprived IMEM (E2+). Cells were counted on day-7 using a Coulter counter. Data represent mean  $\pm$  SD (n = 3 biological replicates), one-way ANOVA with a Dunnett's post-hoc test. **B)** Estrogen responsive element (ERE) luciferase reporter assay. Cells were co-transfected with pGLB-MERE and internal control pCMV-Renilla. Next day, MCF-7 and T47D WT and RBKO cells were treated as indicated for 24 hours and then were subjected to dual-luciferase reporter assay. Data represent mean  $\pm$  SD (n = 5 biological replicates, MCF-7\_WT and \_RBKO Fulv, E2-, and E2+ n = 4 biological replicates), one-way ANOVA with a Dunnett's post-hoc test. **C)** Cell cycle analysis of MCF-7 and T47D WT and RBKO cells. Cells were treated as indicated for 3 days, fixed, and then stained with propidium (PI). Cell cycle analysis was conducted using flow cytometry (mean  $\pm$  SD, n = 3 biological replicates), one-way ANOVA with a Dunnett's post-hoc test. Source data are provided as a Source Data file.

Supplementary Figure 7.

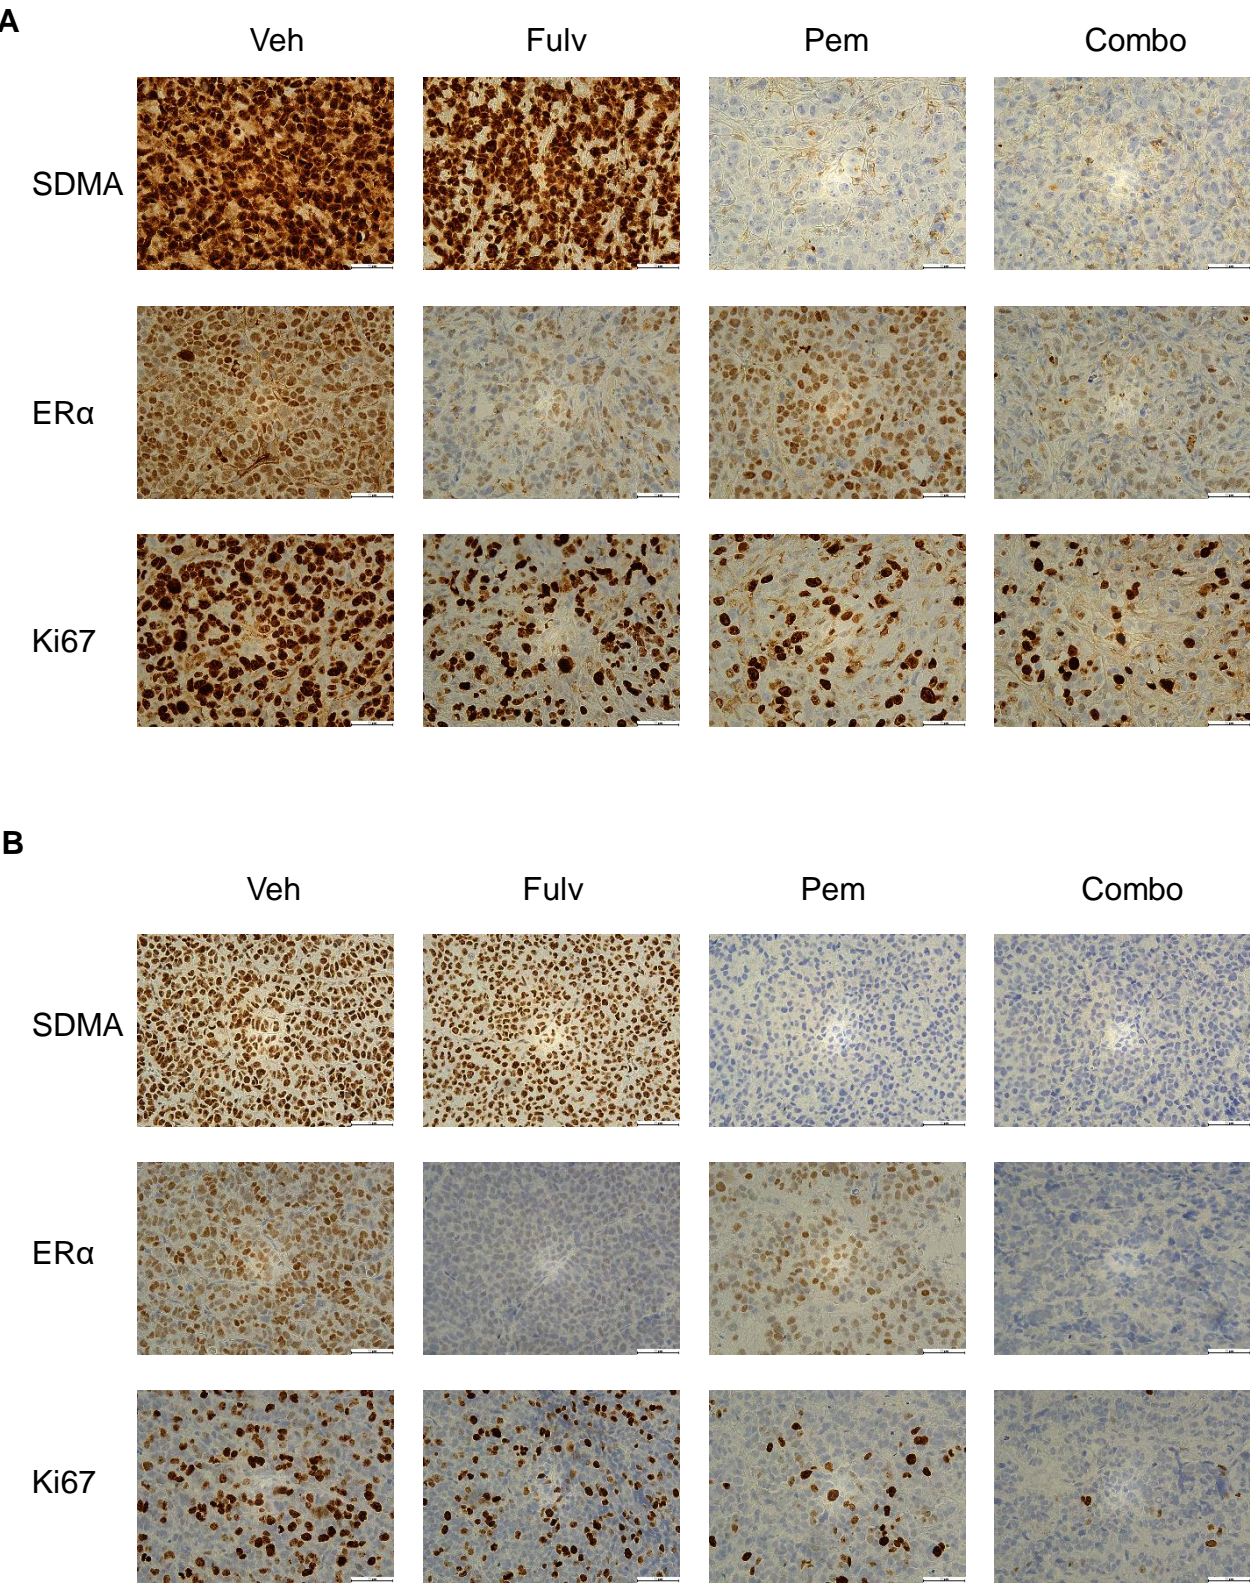

### Supplementary Figure 7. IHC of ER+/RB-deficient tumors.

**A-B)** Representative immunohistochemistry (IHC) images of SDMA, ER $\alpha$ , and Ki67 of MCF-7\_RBKO xenografts **(A)** and ER+/RB1-deleted PDXs **(B)**. The mice were treated with vehicle control (Veh), fulvestrant (Fulv, 5 mg/kg/week, s.c.), pemrametostat (Pem, 200 mg/kg/day, p.o.), or combination of both drugs (Combo). Scale bars on the lower right depict 50  $\mu$ M.

Supplementary Figure 8.

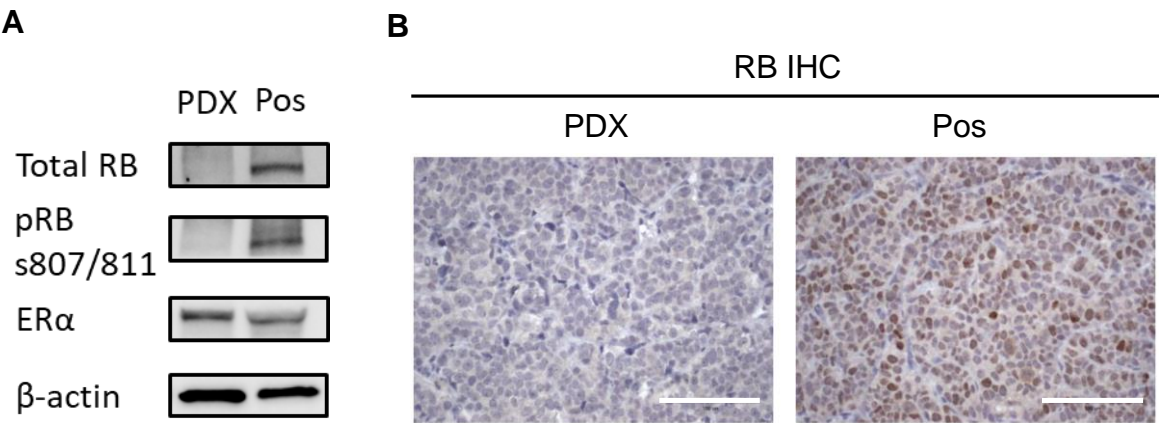

### **Supplementary Figure 8. Characterization of the ER+/*RB1*-deleted PDX.**

**A)** Immunoblot analysis of the patient-derived xenografts (PDX) lysates, probed with the indicated antibodies (n = 2 biological replicates). **B)** IHC of total RB on PDX FFPE sections (n = 2 biological replicates). Pos: positive control. Scale bars on the lower right depict 100  $\mu$ M.

Supplementary Figure 9.

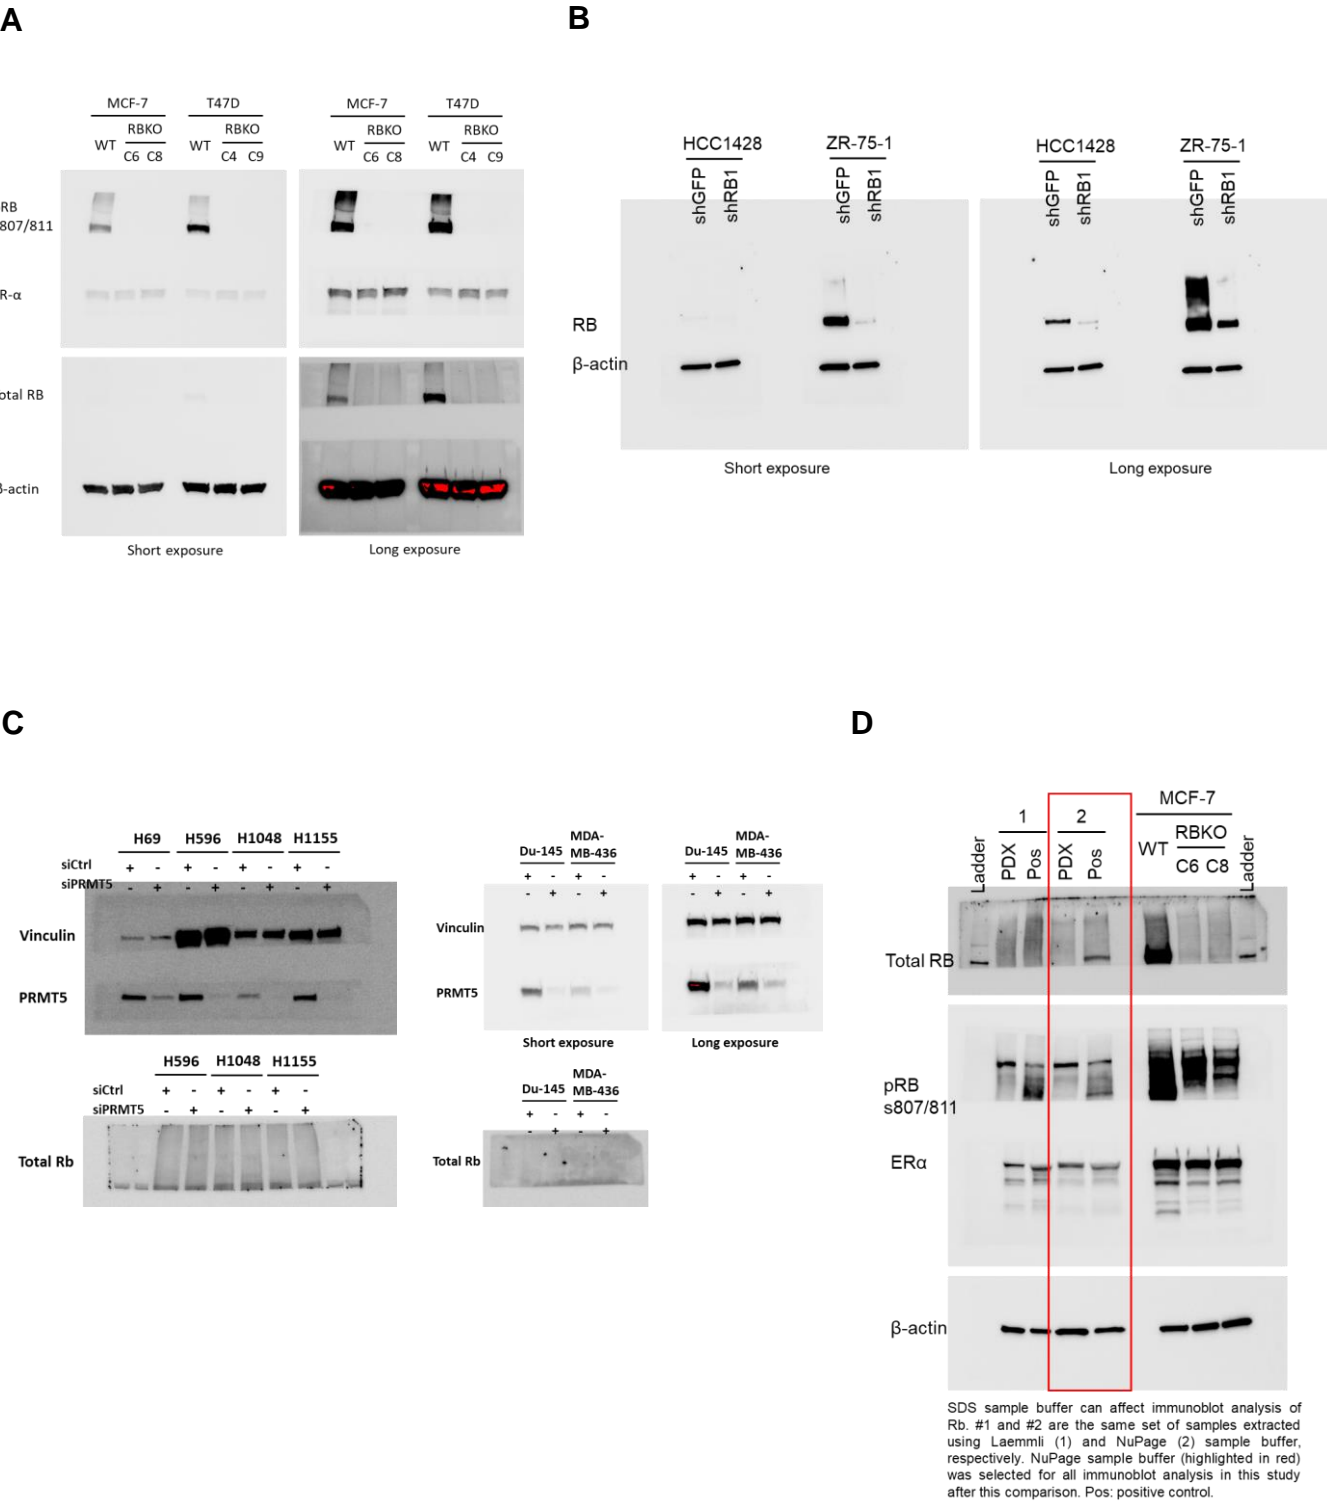

### **Supplementary Figure 9. Uncropped immunoblot images**

Uncropped immunoblot images for **A) Supplementary Figure 1A**, **B) Supplementary Figure 3A**, **C), Supplementary Figure 5A**, and **D) Supplementary Figure 7A**.

Supplementary Figure 10.

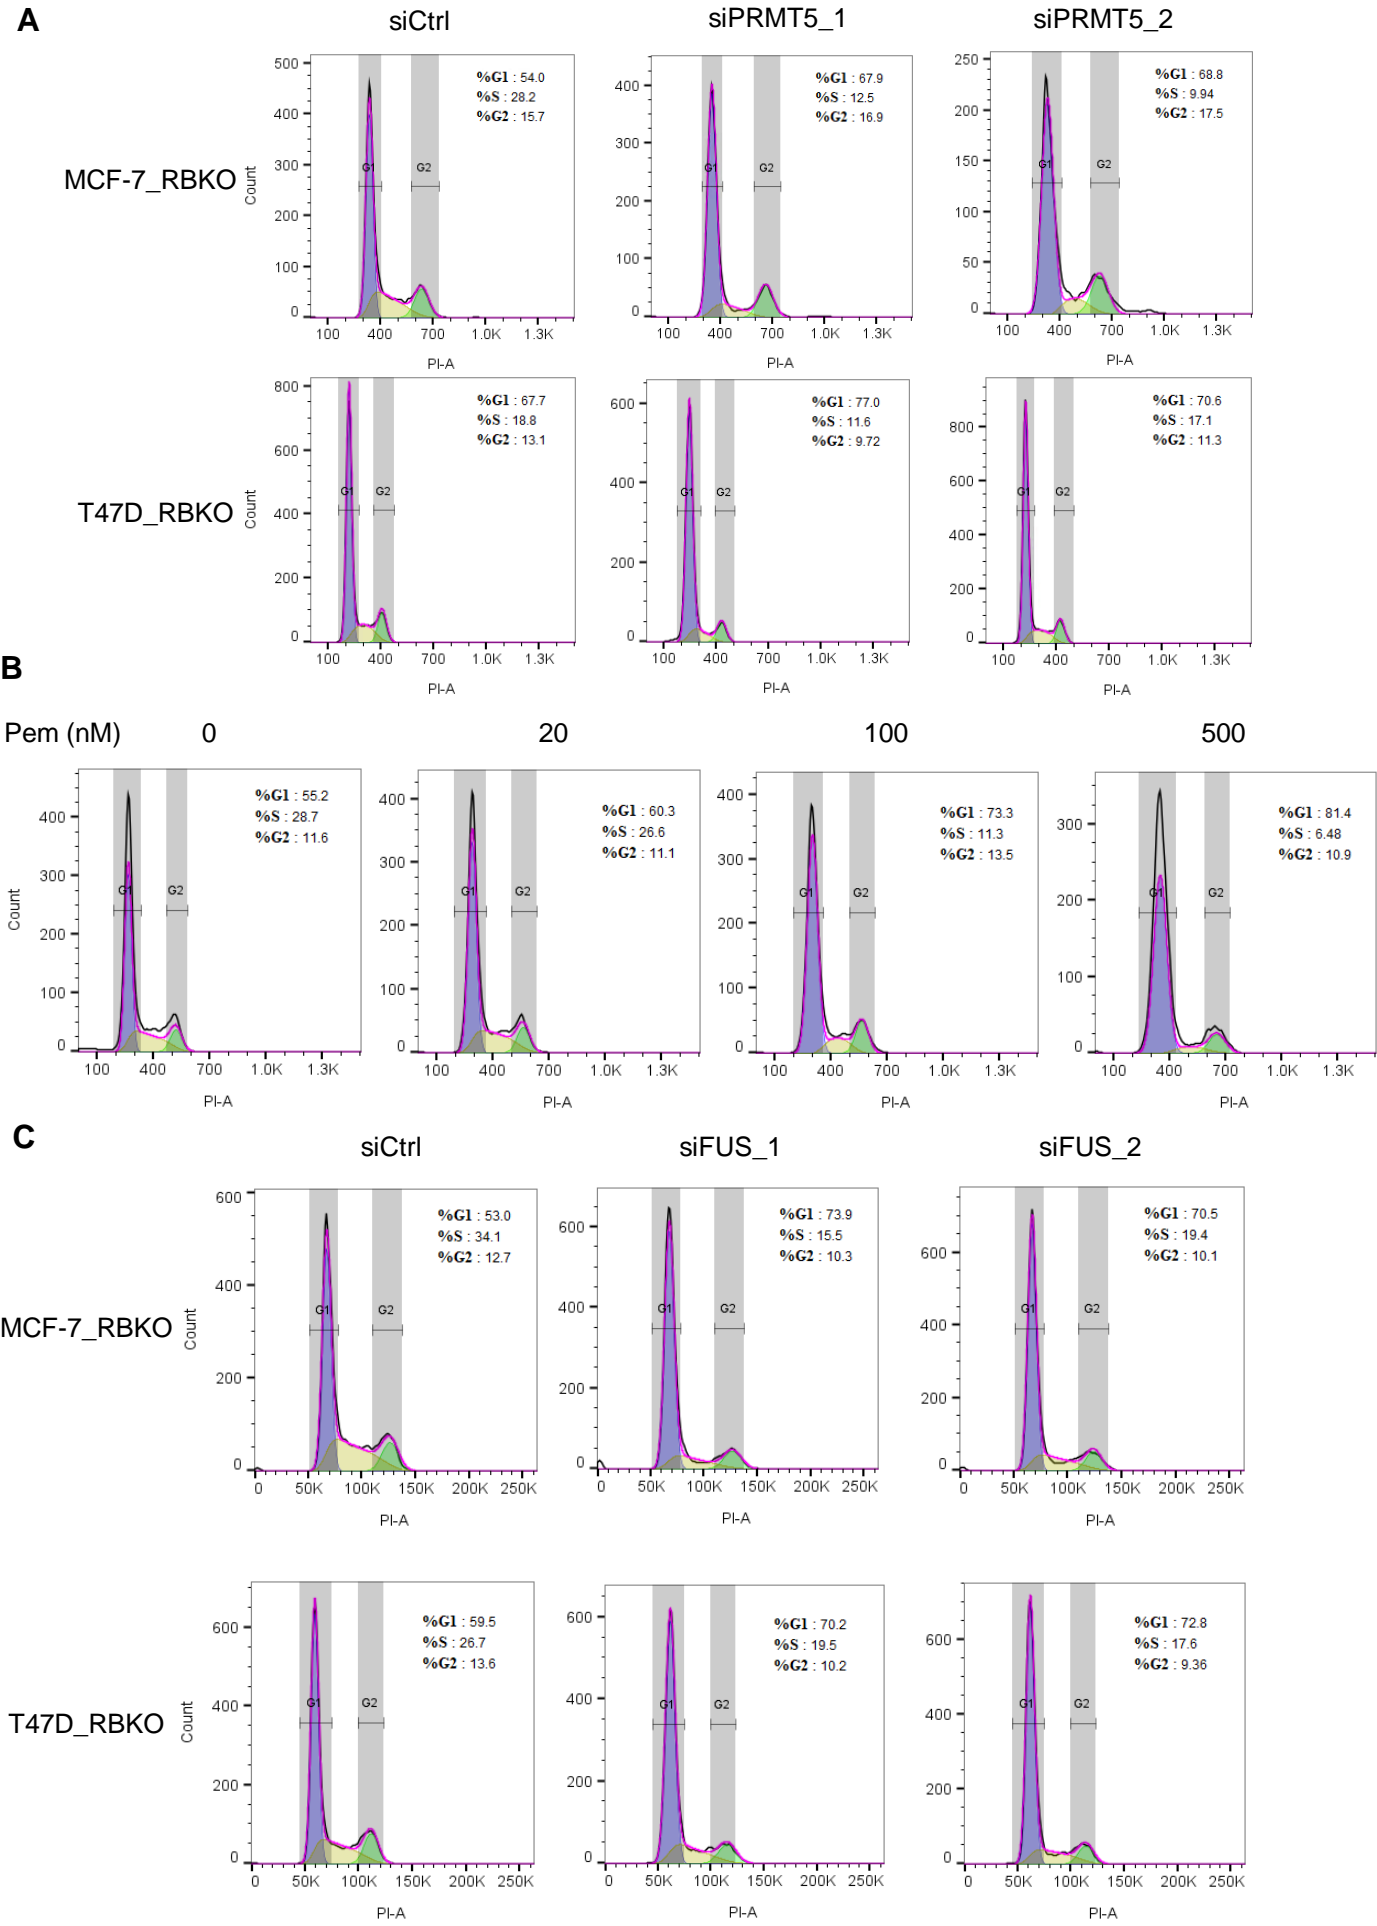

Supplementary Figure 10. Continued

D

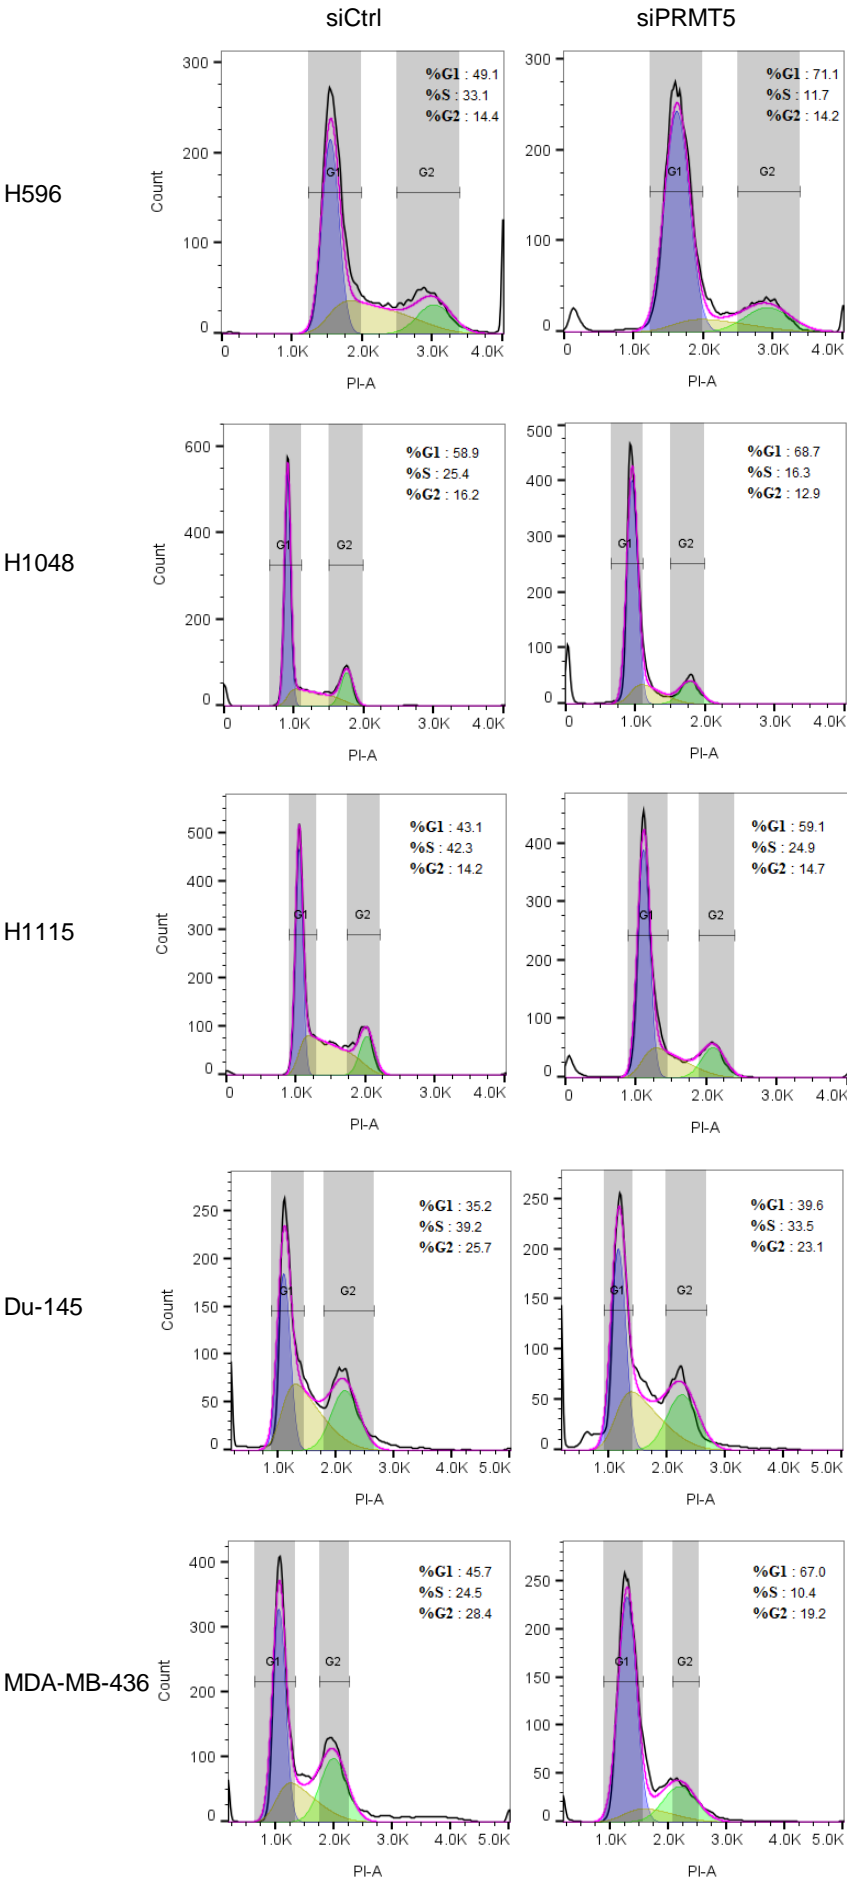

Supplementary Figure 10. Continued

E

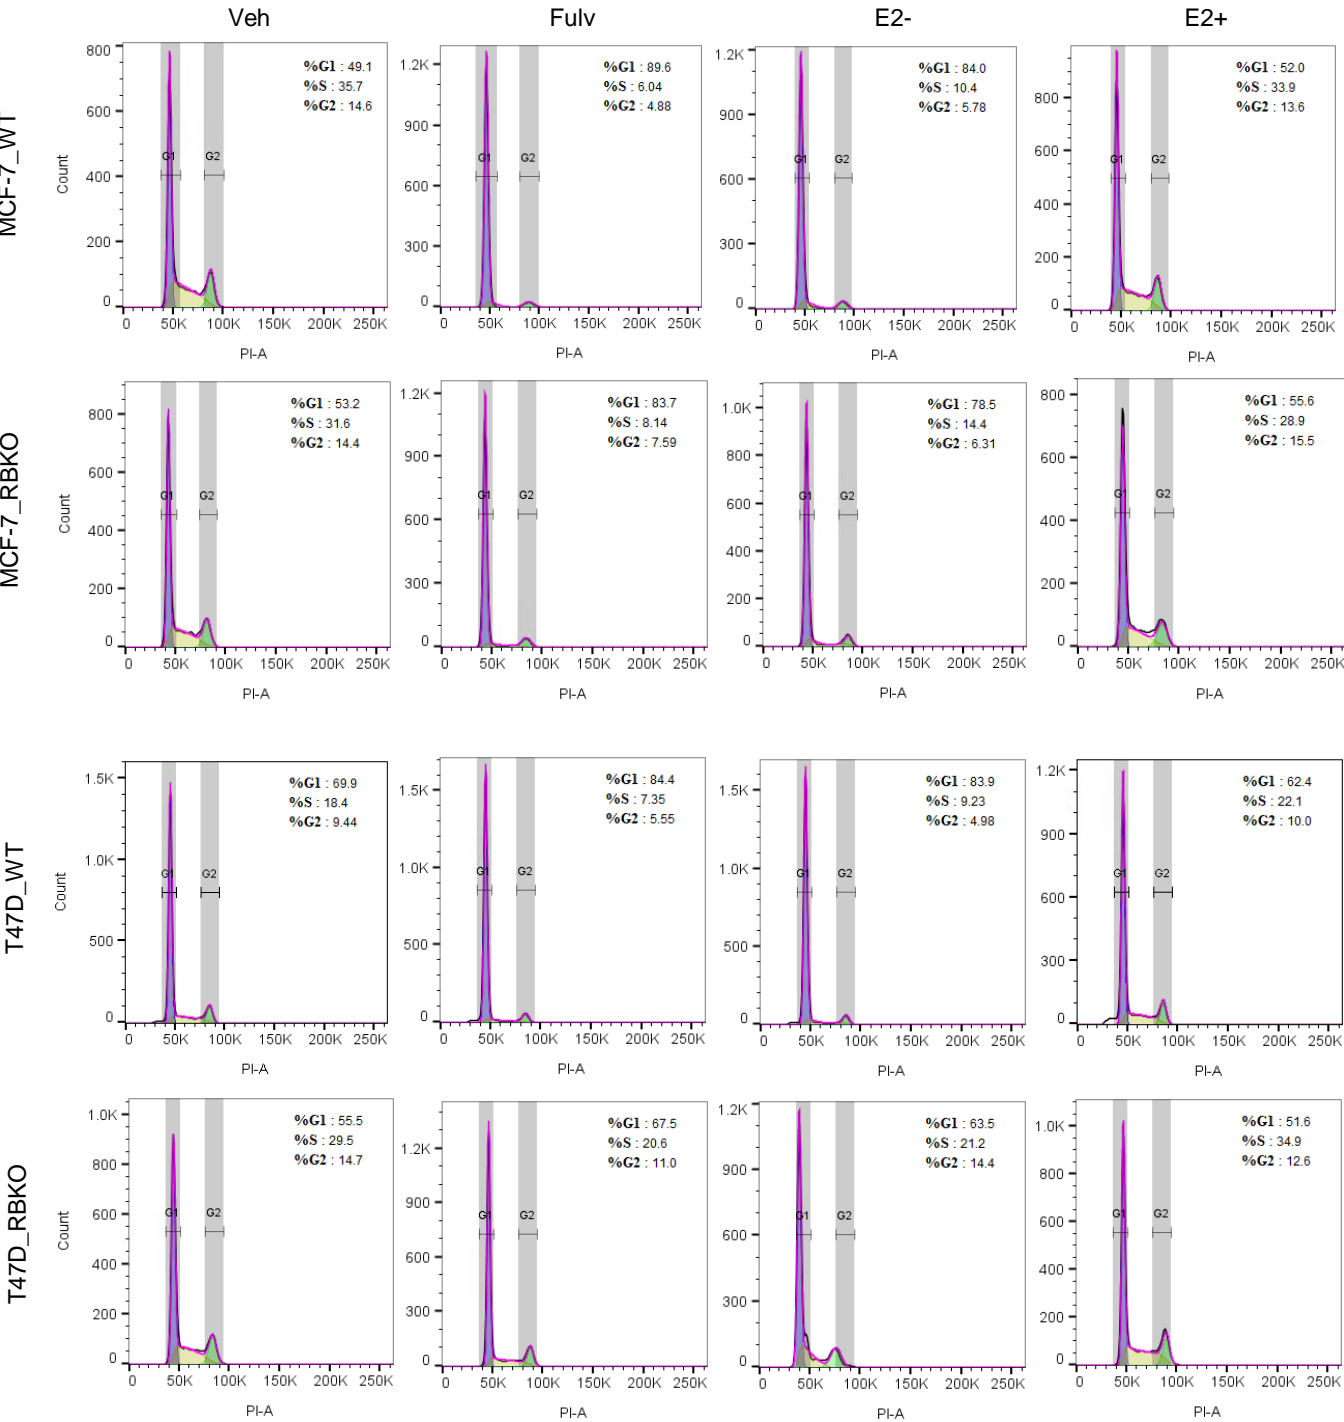

**Supplementary Figure 10. Gating strategy for cell cycle analysis**

Gating strategy for **A) Fig. 3D**, **B) Fig. 3E**, **C) Fig. 4G**, **D) Supplementary Figure 5C**, and **E) Supplementary Figure 6C**.
